# Supplementary material for: Anti-Inflammatory Components of the Starfish Astropecten polyacanthus
Source: MDPI journal article supplement (doi:10.3390/md11082917), 2013-08-13
Supplement: s1 [file s1]

marinedrugs-11-02917-s001.mol
  corina  04141403203D 1   1.00000     0.00000 
CORINA 3.49 0023  12.04.2013
 30 33  0  0  0  0  0  0  0  0999 V2000
    0.1807    1.4749   -0.5904 C   0  0  0  0  0  0  0  0  0  0  0  0
    0.1967   -0.0503   -0.5601 C   0  0  0  0  0  0  0  0  0  0  0  0
    0.9556   -0.5762    0.6705 C   0  0  0  0  0  0  0  0  0  0  0  0
    2.3492    0.0000    0.6227 C   0  0  0  0  0  0  0  0  0  0  0  0
    2.2690    1.5542    0.7509 C   0  0  0  0  0  0  0  0  0  0  0  0
    1.5948    2.0630   -0.5127 C   0  0  0  0  0  0  0  0  0  0  0  0
    3.7495    1.8261    0.8690 C   0  0  0  0  0  0  0  0  0  0  0  0
    4.2201    0.8096    1.9641 C   0  0  0  0  0  0  0  0  0  0  0  0
    3.3090   -0.4075    1.7501 C   0  0  0  0  0  0  0  0  0  0  0  0
    4.2855    3.1932    1.1769 C   0  0  0  0  0  0  0  0  0  0  0  0
    5.6894    0.6846    1.7543 C   0  0  0  0  0  0  0  0  0  0  0  0
    6.3815    2.0669    1.9362 C   0  0  0  0  0  0  0  0  0  0  0  0
    5.8259    3.1149    1.0069 C   0  0  0  0  0  0  0  0  0  0  0  0
    6.5316   -0.1624    2.7178 C   0  0  0  0  0  0  0  0  0  0  0  0
    7.9756    0.2511    2.2954 C   0  0  0  0  0  0  0  0  0  0  0  0
    7.8566    1.6873    1.7238 C   0  0  0  0  0  0  0  0  0  0  0  0
    8.7560    2.6487    2.4986 C   0  0  0  0  0  0  0  0  0  0  0  0
   10.2030    2.1554    2.4365 C   0  0  0  0  0  0  0  0  0  0  0  0
   11.0838    3.0469    3.3142 C   0  0  0  0  0  0  0  0  0  0  0  0
   12.5308    2.5536    3.2521 C   0  0  0  0  0  0  0  0  0  0  0  0
   13.4116    3.4451    4.1298 C   0  0  0  0  0  0  0  0  0  0  0  0
   12.9941    3.2917    5.5937 C   0  0  0  0  0  0  0  0  0  0  0  0
   14.8757    3.0302    3.9709 C   0  0  0  0  0  0  0  0  0  0  0  0
    8.6659    4.0440    1.8774 C   0  0  0  0  0  0  0  0  0  0  0  0
    6.2918    2.5841    3.3701 C   0  0  0  0  0  0  0  0  0  0  0  0
    3.9313    1.3122    3.2701 O   0  0  0  0  0  0  0  0  0  0  0  0
    1.5118    2.0151    1.9904 C   0  0  0  0  0  0  0  0  0  0  0  0
   -1.1482   -0.5312   -0.5186 O   0  0  0  0  0  0  0  0  0  0  0  0
    4.0893   -1.6240    1.3363 C   0  0  0  0  0  0  0  0  0  0  0  0
    4.0626   -2.6196    2.0192 O   0  0  0  0  0  0  0  0  0  0  0  0
  1  2  1  0      
  2  3  1  0      
  3  4  1  0      
  4  5  1  0      
  5  6  1  0      
  6  1  1  0      
  5  7  1  0      
  7  8  1  0      
  8  9  1  0      
  4  9  1  0      
  7 10  1  0      
  8 11  1  0      
 11 12  1  0      
 12 13  1  0      
 13 10  1  0      
 11 14  1  0      
 14 15  1  0      
 15 16  1  0      
 16 12  1  0      
 16 17  1  0      
 17 18  1  0      
 18 19  1  0      
 19 20  1  0      
 20 21  1  0      
 21 22  1  0      
 21 23  1  0      
 17 24  1  0      
 12 25  1  0      
  8 26  1  0      
  5 27  1  0      
  2 28  1  0      
  9 29  1  0      
 29 30  2  0      
M  STY  1   1 SUP
M  SLB  1   1   1
M  SAL   1  2  29  30
M  SBL   1  1  32
M  SMT   1 CHO
M  SBV   1 32   -6.5412    5.6999
M  END
$$$$
