# Supplementary material for: Anti-Inflammatory Components of the Starfish Astropecten polyacanthus
Source: MDPI journal article supplement (doi:10.3390/md11082917), 2013-08-13
Supplement: s3 [file s3]

marinedrugs-11-02917-s002.mol
  corina  04141403213D 1   1.00000     0.00000 
CORINA 3.49 0023  12.04.2013
 32 36  0  0  0  0  0  0  0  0999 V2000
   -0.0187    1.5252    0.0104 C   0  0  0  0  0  0  0  0  0  0  0  0
    0.0021   -0.0041    0.0020 C   0  0  0  0  0  0  0  0  0  0  0  0
    0.7497   -0.5185    1.2355 C   0  0  0  0  0  0  0  0  0  0  0  0
    2.1806    0.0204    1.2137 C   0  0  0  0  0  0  0  0  0  0  0  0
    2.1533    1.5427    1.2335 C   0  0  0  0  0  0  0  0  0  0  0  0
    1.4156    2.0614   -0.0004 C   0  0  0  0  0  0  0  0  0  0  0  0
    3.5011    2.1772    1.3933 C   0  0  0  0  0  0  0  0  0  0  0  0
    4.5650    1.2100    1.8014 C   0  0  0  0  0  0  0  0  0  0  0  0
    4.4274   -0.2248    2.1520 C   0  0  0  0  0  0  0  0  0  0  0  0
    4.0478    2.9446    0.1926 C   0  0  0  0  0  0  0  0  0  0  0  0
    5.7603    1.7219    1.8517 C   0  0  0  0  0  0  0  0  0  0  0  0
    6.1335    3.1531    1.6342 C   0  0  0  0  0  0  0  0  0  0  0  0
    5.2706    3.7910    0.5779 C   0  0  0  0  0  0  0  0  0  0  0  0
    6.9950    0.8953    2.1499 C   0  0  0  0  0  0  0  0  0  0  0  0
    8.0917    1.9459    2.3590 C   0  0  0  0  0  0  0  0  0  0  0  0
    7.6483    3.1154    1.4111 C   0  0  0  0  0  0  0  0  0  0  0  0
    8.2948    4.4356    1.8350 C   0  0  0  0  0  0  0  0  0  0  0  0
    9.8168    4.3128    1.7371 C   0  0  0  0  0  0  0  0  0  0  0  0
   10.4671    5.5876    2.2783 C   0  0  0  0  0  0  0  0  0  0  0  0
   11.9891    5.4648    2.1803 C   0  0  0  0  0  0  0  0  0  0  0  0
   12.6395    6.7396    2.7215 C   0  0  0  0  0  0  0  0  0  0  0  0
   14.1597    6.5683    2.7397 C   0  0  0  0  0  0  0  0  0  0  0  0
   12.2701    7.9216    1.8230 C   0  0  0  0  0  0  0  0  0  0  0  0
    7.8134    5.5582    0.9137 C   0  0  0  0  0  0  0  0  0  0  0  0
    5.8948    3.8973    2.9495 C   0  0  0  0  0  0  0  0  0  0  0  0
    1.3279    1.9588    2.4528 C   0  0  0  0  0  0  0  0  0  0  0  0
   -1.3389   -0.4976    0.0190 O   0  0  0  0  0  0  0  0  0  0  0  0
    2.9657   -0.5395    2.4124 C   0  0  0  0  0  0  0  0  0  0  0  0
    5.3894   -0.6829    3.0640 O   0  0  0  0  0  0  0  0  0  0  0  0
    6.6044    0.1341    3.2948 O   0  0  0  0  0  0  0  0  0  0  0  0
    4.6603   -0.7504    1.2259 H   0  0  0  0  0  0  0  0  0  0  0  0
    7.3157    0.0422    1.0493 O   0  0  0  0  0  0  0  0  0  0  0  0
  1  2  1  0      
  2  3  1  0      
  3  4  1  0      
  4  5  1  0      
  5  6  1  0      
  6  1  1  0      
  5  7  1  0      
  7  8  1  0      
  8  9  1  0      
  7 10  1  0      
  8 11  2  0      
 11 12  1  0      
 12 13  1  0      
 13 10  1  0      
 11 14  1  0      
 14 15  1  0      
 15 16  1  0      
 16 12  1  0      
 16 17  1  0      
 17 18  1  0      
 18 19  1  0      
 19 20  1  0      
 20 21  1  0      
 21 22  1  0      
 21 23  1  0      
 17 24  1  0      
 12 25  1  0      
  5 26  1  0      
  2 27  1  0      
  4 28  1  0      
 28  9  1  0      
  9 29  1  0      
 14 30  1  0      
 29 30  1  0      
  9 31  1  0      
 14 32  1  0      
M  END
$$$$
