# Supplementary material for: Anti-Inflammatory Components of the Starfish Astropecten polyacanthus
Source: MDPI journal article supplement (doi:10.3390/md11082917), 2013-08-13
Supplement: s4 [file s4]

marinedrugs-11-02917-s002.mol
  ChemDraw12271311532D

 32 36  0  0  0  0  0  0  0  0999 V2000
   -3.7142   -0.6113    0.0000 C   0  0  0  0  0  0  0  0  0  0  0  0
   -3.7142   -1.4363    0.0000 C   0  0  0  0  0  0  0  0  0  0  0  0
   -2.9997   -1.8488    0.0000 C   0  0  0  0  0  0  0  0  0  0  0  0
   -2.2853   -1.4363    0.0000 C   0  0  0  0  0  0  0  0  0  0  0  0
   -2.2853   -0.6113    0.0000 C   0  0  0  0  0  0  0  0  0  0  0  0
   -2.9997   -0.1988    0.0000 C   0  0  0  0  0  0  0  0  0  0  0  0
   -1.5708   -0.1988    0.0000 C   0  0  0  0  0  0  0  0  0  0  0  0
   -0.8563   -0.6113    0.0000 C   0  0  0  0  0  0  0  0  0  0  0  0
   -0.8563   -1.4363    0.0000 C   0  0  0  0  0  0  0  0  0  0  0  0
   -1.5708    0.6262    0.0000 C   0  0  0  0  0  0  0  0  0  0  0  0
   -0.1418   -0.1988    0.0000 C   0  0  0  0  0  0  0  0  0  0  0  0
   -0.1418    0.6262    0.0000 C   0  0  0  0  0  0  0  0  0  0  0  0
   -0.8563    1.0387    0.0000 C   0  0  0  0  0  0  0  0  0  0  0  0
    0.6428   -0.4538    0.0000 C   0  0  0  0  0  0  0  0  0  0  0  0
    1.1277    0.2137    0.0000 C   0  0  0  0  0  0  0  0  0  0  0  0
    0.6428    0.8811    0.0000 C   0  0  0  0  0  0  0  0  0  0  0  0
    0.8563    1.6780    0.0000 C   0  0  0  0  0  0  0  0  0  0  0  0
    1.5708    2.0905    0.0000 C   0  0  0  0  0  0  0  0  0  0  0  0
    2.2853    1.6780    0.0000 C   0  0  0  0  0  0  0  0  0  0  0  0
    2.9997    2.0905    0.0000 C   0  0  0  0  0  0  0  0  0  0  0  0
    3.7142    1.6780    0.0000 C   0  0  0  0  0  0  0  0  0  0  0  0
    4.4287    2.0905    0.0000 C   0  0  0  0  0  0  0  0  0  0  0  0
    3.7142    0.8530    0.0000 C   0  0  0  0  0  0  0  0  0  0  0  0
    0.2729    2.2613    0.0000 C   0  0  0  0  0  0  0  0  0  0  0  0
   -0.1418    1.4512    0.0000 C   0  0  0  0  0  0  0  0  0  0  0  0
   -2.2853    0.2137    0.0000 C   0  0  0  0  0  0  0  0  0  0  0  0
   -4.4287   -1.8488    0.0000 O   0  0  0  0  0  0  0  0  0  0  0  0
   -1.5708   -1.8488    0.0000 C   0  0  0  0  0  0  0  0  0  0  0  0
   -0.1033   -1.6525    0.0000 O   0  0  0  0  0  0  0  0  0  0  0  0
    0.6392   -1.2400    0.0000 O   0  0  0  0  0  0  0  0  0  0  0  0
   -0.8563   -2.2613    0.0000 H   0  0  0  0  0  0  0  0  0  0  0  0
    1.4397   -0.6673    0.0000 O   0  0  0  0  0  0  0  0  0  0  0  0
  1  2  1  0      
  2  3  1  0      
  3  4  1  0      
  4  5  1  0      
  5  6  1  0      
  6  1  1  0      
  5  7  1  0      
  7  8  1  0      
  8  9  1  0      
  7 10  1  0      
  8 11  2  0      
 11 12  1  0      
 12 13  1  0      
 13 10  1  0      
 11 14  1  0      
 14 15  1  0      
 15 16  1  0      
 16 12  1  0      
 16 17  1  1      
 17 18  1  0      
 18 19  1  0      
 19 20  1  0      
 20 21  1  0      
 21 22  1  0      
 21 23  1  0      
 17 24  1  6      
 12 25  1  1      
  5 26  1  1      
  2 27  1  1      
  4 28  1  0      
 28  9  1  0      
  9 29  1  0      
 14 30  1  0      
 29 30  1  0      
  9 31  1  6      
 14 32  1  6      
M  END
