# Supplementary material for: Anti-Inflammatory Components of the Starfish Astropecten polyacanthus
Source: MDPI journal article supplement (doi:10.3390/md11082917), 2013-08-13
Supplement: s5 [file s5]

marinedrugs-11-02917-s003.mol
  corina  04141403213D 1   1.00000     0.00000 
CORINA 3.49 0023  12.04.2013
 30 34  0  0  0  0  0  0  0  0999 V2000
   -0.6229    1.8742    1.2914 C   0  0  0  0  0  0  0  0  0  0  0  0
   -0.7023    0.3524    1.1526 C   0  0  0  0  0  0  0  0  0  0  0  0
    0.2078   -0.3016    2.1940 C   0  0  0  0  0  0  0  0  0  0  0  0
    1.6508    0.1579    1.9723 C   0  0  0  0  0  0  0  0  0  0  0  0
    1.7341    1.6747    2.0972 C   0  0  0  0  0  0  0  0  0  0  0  0
    0.8189    2.3311    1.0610 C   0  0  0  0  0  0  0  0  0  0  0  0
    3.1676    2.1771    1.8931 C   0  0  0  0  0  0  0  0  0  0  0  0
    4.3094    1.2112    2.2111 C   0  0  0  0  0  0  0  0  0  0  0  0
    3.9860   -0.1931    2.6396 C   0  0  0  0  0  0  0  0  0  0  0  0
    3.3595    3.6567    2.1978 C   0  0  0  0  0  0  0  0  0  0  0  0
    5.5842    1.8205    2.7408 C   0  0  0  0  0  0  0  0  0  0  0  0
    5.6090    3.2428    3.2695 C   0  0  0  0  0  0  0  0  0  0  0  0
    4.7919    4.1138    2.3326 C   0  0  0  0  0  0  0  0  0  0  0  0
    6.7668    1.2836    2.7914 C   0  0  0  0  0  0  0  0  0  0  0  0
    7.7776    2.2512    3.3667 C   0  0  0  0  0  0  0  0  0  0  0  0
    7.0973    3.6380    3.2553 C   0  0  0  0  0  0  0  0  0  0  0  0
    7.4442    4.5192    4.4570 C   0  0  0  0  0  0  0  0  0  0  0  0
    8.9647    4.6163    4.5963 C   0  0  0  0  0  0  0  0  0  0  0  0
    9.3119    5.3929    5.8680 C   0  0  0  0  0  0  0  0  0  0  0  0
   10.8324    5.4900    6.0072 C   0  0  0  0  0  0  0  0  0  0  0  0
   11.1795    6.2665    7.2790 C   0  0  0  0  0  0  0  0  0  0  0  0
   12.6956    6.2569    7.4846 C   0  0  0  0  0  0  0  0  0  0  0  0
   10.6924    7.7106    7.1437 C   0  0  0  0  0  0  0  0  0  0  0  0
    6.8607    5.9182    4.2490 C   0  0  0  0  0  0  0  0  0  0  0  0
    5.0353    3.2980    4.6868 C   0  0  0  0  0  0  0  0  0  0  0  0
    1.2728    2.0841    3.4973 C   0  0  0  0  0  0  0  0  0  0  0  0
   -2.0496   -0.0755    1.3613 O   0  0  0  0  0  0  0  0  0  0  0  0
    2.5522   -0.4957    3.0289 C   0  0  0  0  0  0  0  0  0  0  0  0
    4.8373   -1.0490    2.6724 O   0  0  0  0  0  0  0  0  0  0  0  0
    3.9495    1.5739    0.8687 O   0  0  0  0  0  0  0  0  0  0  0  0
  1  2  1  0      
  2  3  1  0      
  3  4  1  0      
  4  5  1  0      
  5  6  1  0      
  6  1  1  0      
  5  7  1  0      
  7  8  1  0      
  8  9  1  0      
  7 10  1  0      
  8 11  1  0      
 11 12  1  0      
 12 13  1  0      
 13 10  1  0      
 11 14  2  0      
 14 15  1  0      
 15 16  1  0      
 16 12  1  0      
 16 17  1  0      
 17 18  1  0      
 18 19  1  0      
 19 20  1  0      
 20 21  1  0      
 21 22  1  0      
 21 23  1  0      
 17 24  1  0      
 12 25  1  0      
  5 26  1  0      
  2 27  1  0      
  4 28  1  0      
 28  9  1  0      
  9 29  2  0      
  7 30  1  0      
  8 30  1  0      
M  END
$$$$
