# Supplementary material for: Anti-Inflammatory Components of the Starfish Astropecten polyacanthus
Source: MDPI journal article supplement (doi:10.3390/md11082917), 2013-08-13
Supplement: s7 [file s7]

marinedrugs-11-02917-s004.mol
  corina  04141403213D 1   1.00000     0.00000 
CORINA 3.49 0023  12.04.2013
 30 33  0  0  0  0  0  0  0  0999 V2000
   -0.0187    1.5264    0.0104 C   0  0  0  0  0  0  0  0  0  0  0  0
    0.0021   -0.0041    0.0020 C   0  0  0  0  0  0  0  0  0  0  0  0
    0.7271   -0.5041    1.2517 C   0  0  0  0  0  0  0  0  0  0  0  0
    2.1656    0.0201    1.2621 C   0  0  0  0  0  0  0  0  0  0  0  0
    2.1607    1.5478    1.2418 C   0  0  0  0  0  0  0  0  0  0  0  0
    1.4186    2.0479   -0.0005 C   0  0  0  0  0  0  0  0  0  0  0  0
    3.5787    2.0957    1.2321 C   0  0  0  0  0  0  0  0  0  0  0  0
    4.5297    1.2776    2.0660 C   0  0  0  0  0  0  0  0  0  0  0  0
    4.2156    0.1596    2.6422 C   0  0  0  0  0  0  0  0  0  0  0  0
    3.5819    3.5644    1.6486 C   0  0  0  0  0  0  0  0  0  0  0  0
    5.9155    1.8441    2.2088 C   0  0  0  0  0  0  0  0  0  0  0  0
    5.7197    3.2592    2.8231 C   0  0  0  0  0  0  0  0  0  0  0  0
    5.0124    4.1113    1.7956 C   0  0  0  0  0  0  0  0  0  0  0  0
    6.8148    1.1864    3.2585 C   0  0  0  0  0  0  0  0  0  0  0  0
    7.8294    2.3153    3.5966 C   0  0  0  0  0  0  0  0  0  0  0  0
    7.1262    3.6526    3.2459 C   0  0  0  0  0  0  0  0  0  0  0  0
    7.0768    4.5651    4.4730 C   0  0  0  0  0  0  0  0  0  0  0  0
    8.5020    4.8890    4.9254 C   0  0  0  0  0  0  0  0  0  0  0  0
    8.4537    5.6975    6.2235 C   0  0  0  0  0  0  0  0  0  0  0  0
    9.8789    6.0214    6.6759 C   0  0  0  0  0  0  0  0  0  0  0  0
    9.8306    6.8299    7.9739 C   0  0  0  0  0  0  0  0  0  0  0  0
   11.2535    7.0469    8.4928 C   0  0  0  0  0  0  0  0  0  0  0  0
    9.1730    8.1852    7.7064 C   0  0  0  0  0  0  0  0  0  0  0  0
    6.3482    5.8620    4.1152 C   0  0  0  0  0  0  0  0  0  0  0  0
    4.8450    3.1466    4.0733 C   0  0  0  0  0  0  0  0  0  0  0  0
    1.4510    2.0655    2.4945 C   0  0  0  0  0  0  0  0  0  0  0  0
   -1.3382   -0.4996   -0.0027 O   0  0  0  0  0  0  0  0  0  0  0  0
    2.8464   -0.4497    2.5534 C   0  0  0  0  0  0  0  0  0  0  0  0
    4.0456    2.0536   -0.1178 O   0  0  0  0  0  0  0  0  0  0  0  0
    2.2526   -0.1370    3.4123 H   0  0  0  0  0  0  0  0  0  0  0  0
  1  2  1  0      
  2  3  1  0      
  3  4  1  0      
  4  5  1  0      
  5  6  1  0      
  6  1  1  0      
  5  7  1  0      
  7  8  1  0      
  8  9  2  0      
  7 10  1  0      
  8 11  1  0      
 11 12  1  0      
 12 13  1  0      
 13 10  1  0      
 11 14  1  0      
 14 15  1  0      
 15 16  1  0      
 16 12  1  0      
 16 17  1  0      
 17 18  1  0      
 18 19  1  0      
 19 20  1  0      
 20 21  1  0      
 21 22  1  0      
 21 23  1  0      
 17 24  1  0      
 12 25  1  0      
  5 26  1  0      
  2 27  1  0      
  4 28  1  0      
 28  9  1  0      
  7 29  1  0      
 28 30  1  0      
M  END
$$$$
