# Supplementary material for: Anti-Inflammatory Components of the Starfish Astropecten polyacanthus
Source: MDPI journal article supplement (doi:10.3390/md11082917), 2013-08-13
Supplement: s9 [file s9]

marinedrugs-11-02917-s005.mol
  corina  04141403223D 1   1.00000     0.00000 
CORINA 3.49 0023  12.04.2013
 29 32  0  0  0  0  0  0  0  0999 V2000
    0.2597    1.2688   -0.1686 C   0  0  0  0  0  0  0  0  0  0  0  0
    0.3432   -0.2594   -0.1787 C   0  0  0  0  0  0  0  0  0  0  0  0
    1.0616   -0.7342    1.0849 C   0  0  0  0  0  0  0  0  0  0  0  0
    2.4769   -0.1513    1.1246 C   0  0  0  0  0  0  0  0  0  0  0  0
    2.4027    1.3768    1.1186 C   0  0  0  0  0  0  0  0  0  0  0  0
    1.6732    1.8514   -0.1409 C   0  0  0  0  0  0  0  0  0  0  0  0
    3.8210    1.9573    1.1156 C   0  0  0  0  0  0  0  0  0  0  0  0
    4.5975    1.3744    2.2622 C   0  0  0  0  0  0  0  0  0  0  0  0
    4.6215   -0.1329    2.4165 C   0  0  0  0  0  0  0  0  0  0  0  0
    3.7697    3.4729    1.1258 C   0  0  0  0  0  0  0  0  0  0  0  0
    5.2313    2.1189    3.1199 C   0  0  0  0  0  0  0  0  0  0  0  0
    5.2221    3.6402    3.1209 C   0  0  0  0  0  0  0  0  0  0  0  0
    5.0626    4.0871    1.6663 C   0  0  0  0  0  0  0  0  0  0  0  0
    6.1630    1.6842    4.2261 C   0  0  0  0  0  0  0  0  0  0  0  0
    6.8094    2.9676    4.7938 C   0  0  0  0  0  0  0  0  0  0  0  0
    6.6191    4.0143    3.6621 C   0  0  0  0  0  0  0  0  0  0  0  0
    6.6256    5.4370    4.2249 C   0  0  0  0  0  0  0  0  0  0  0  0
    7.9038    5.6587    5.0360 C   0  0  0  0  0  0  0  0  0  0  0  0
    7.8533    7.0356    5.7013 C   0  0  0  0  0  0  0  0  0  0  0  0
    9.1315    7.2574    6.5124 C   0  0  0  0  0  0  0  0  0  0  0  0
    9.0810    8.6342    7.1776 C   0  0  0  0  0  0  0  0  0  0  0  0
    7.9427    8.6654    8.1995 C   0  0  0  0  0  0  0  0  0  0  0  0
   10.4095    8.9076    7.8856 C   0  0  0  0  0  0  0  0  0  0  0  0
    6.5722    6.4417    3.0723 C   0  0  0  0  0  0  0  0  0  0  0  0
    4.0977    4.1929    3.9991 C   0  0  0  0  0  0  0  0  0  0  0  0
    1.6479    1.8578    2.3595 C   0  0  0  0  0  0  0  0  0  0  0  0
   -0.9754   -0.8090   -0.2128 O   0  0  0  0  0  0  0  0  0  0  0  0
    3.1749   -0.6362    2.3979 C   0  0  0  0  0  0  0  0  0  0  0  0
    5.3497   -0.7172    1.3346 O   0  0  0  0  0  0  0  0  0  0  0  0
  1  2  1  0      
  2  3  1  0      
  3  4  1  0      
  4  5  1  0      
  5  6  1  0      
  6  1  1  0      
  5  7  1  0      
  7  8  1  0      
  8  9  1  0      
  7 10  1  0      
  8 11  2  0      
 11 12  1  0      
 12 13  1  0      
 13 10  1  0      
 11 14  1  0      
 14 15  1  0      
 15 16  1  0      
 16 12  1  0      
 16 17  1  0      
 17 18  1  0      
 18 19  1  0      
 19 20  1  0      
 20 21  1  0      
 21 22  1  0      
 21 23  1  0      
 17 24  1  0      
 12 25  1  0      
  5 26  1  0      
  2 27  1  0      
  4 28  1  0      
 28  9  1  0      
  9 29  1  0      
M  END
$$$$
