# Supplementary material for: Anti-Inflammatory Components of the Starfish Astropecten polyacanthus
Source: MDPI journal article supplement (doi:10.3390/md11082917), 2013-08-13
Supplement: s11 [file s11]

marinedrugs-11-02917-s006.mol
  corina  04141403223D 1   1.00000     0.00000 
CORINA 3.49 0023  12.04.2013
 28 31  0  0  0  0  0  0  0  0999 V2000
   -0.0187    1.5253    0.0104 C   0  0  0  0  0  0  0  0  0  0  0  0
    0.0021   -0.0041    0.0020 C   0  0  0  0  0  0  0  0  0  0  0  0
    0.7533   -0.5170    1.2333 C   0  0  0  0  0  0  0  0  0  0  0  0
    2.1853    0.0179    1.2080 C   0  0  0  0  0  0  0  0  0  0  0  0
    2.1521    1.5486    1.2371 C   0  0  0  0  0  0  0  0  0  0  0  0
    1.4155    2.0609   -0.0004 C   0  0  0  0  0  0  0  0  0  0  0  0
    3.5662    2.0708    1.2547 C   0  0  0  0  0  0  0  0  0  0  0  0
    4.6350    1.2265    1.8355 C   0  0  0  0  0  0  0  0  0  0  0  0
    4.3628    0.0554    2.3832 C   0  0  0  0  0  0  0  0  0  0  0  0
    3.8303    3.2678    0.7427 C   0  0  0  0  0  0  0  0  0  0  0  0
    6.0326    1.7485    1.7489 C   0  0  0  0  0  0  0  0  0  0  0  0
    5.9393    3.2854    1.9643 C   0  0  0  0  0  0  0  0  0  0  0  0
    5.2219    3.8668    0.7644 C   0  0  0  0  0  0  0  0  0  0  0  0
    6.9877    1.3421    2.8745 C   0  0  0  0  0  0  0  0  0  0  0  0
    8.0659    2.4607    2.8332 C   0  0  0  0  0  0  0  0  0  0  0  0
    7.3896    3.6947    2.1829 C   0  0  0  0  0  0  0  0  0  0  0  0
    7.4653    4.8989    3.1237 C   0  0  0  0  0  0  0  0  0  0  0  0
    8.9312    5.2503    3.3854 C   0  0  0  0  0  0  0  0  0  0  0  0
    9.0094    6.3729    4.4220 C   0  0  0  0  0  0  0  0  0  0  0  0
   10.4753    6.7243    4.6837 C   0  0  0  0  0  0  0  0  0  0  0  0
   10.5535    7.8469    5.7203 C   0  0  0  0  0  0  0  0  0  0  0  0
   10.0128    7.3427    7.0598 C   0  0  0  0  0  0  0  0  0  0  0  0
   12.0099    8.2838    5.8901 C   0  0  0  0  0  0  0  0  0  0  0  0
    6.7614    6.0947    2.4792 C   0  0  0  0  0  0  0  0  0  0  0  0
    5.1375    3.5779    3.2341 C   0  0  0  0  0  0  0  0  0  0  0  0
    1.4210    2.0186    2.4963 C   0  0  0  0  0  0  0  0  0  0  0  0
   -1.3387   -0.4978    0.0233 O   0  0  0  0  0  0  0  0  0  0  0  0
    2.9571   -0.4835    2.4298 C   0  0  0  0  0  0  0  0  0  0  0  0
  1  2  1  0      
  2  3  1  0      
  3  4  1  0      
  4  5  1  0      
  5  6  1  0      
  6  1  1  0      
  5  7  1  0      
  7  8  1  0      
  8  9  2  0      
  7 10  2  0      
  8 11  1  0      
 11 12  1  0      
 12 13  1  0      
 13 10  1  0      
 11 14  1  0      
 14 15  1  0      
 15 16  1  0      
 16 12  1  0      
 16 17  1  0      
 17 18  1  0      
 18 19  1  0      
 19 20  1  0      
 20 21  1  0      
 21 22  1  0      
 21 23  1  0      
 17 24  1  0      
 12 25  1  0      
  5 26  1  0      
  2 27  1  0      
  4 28  1  0      
 28  9  1  0      
M  END
$$$$
